# Supplementary material for: Reutilization of Silicon-Cutting Waste via Constructing Multilayer Si@SiO2@C Composites as Anode Materials for Li-Ion Batteries
Source: MDPI journal article supplement (doi:10.3390/nano14070625), 2024-04-02
Supplement: s1 [file s1]

## Supplementary Materials

# Reutilization of Silicon-Cutting Waste via Constructing Multilayer Si@SiO<sub>2</sub>@C Composites as Anode Materials for Li-Ion Batteries

Yi Sun, Jingyi Wu, Xingjie Chen and Chunyan Lai \*

Shanghai Key Laboratory of Materials Protection and Advanced Materials in  
Electric Power,

Shanghai University of Electric Power, Shanghai 200090, China;

15797926318@163.com (Y.S.); wujingyi0728@163.com (J.W.);

a1317358861@163.com (X.C.)

\* Correspondence: laichunyan@shiep.edu.cn

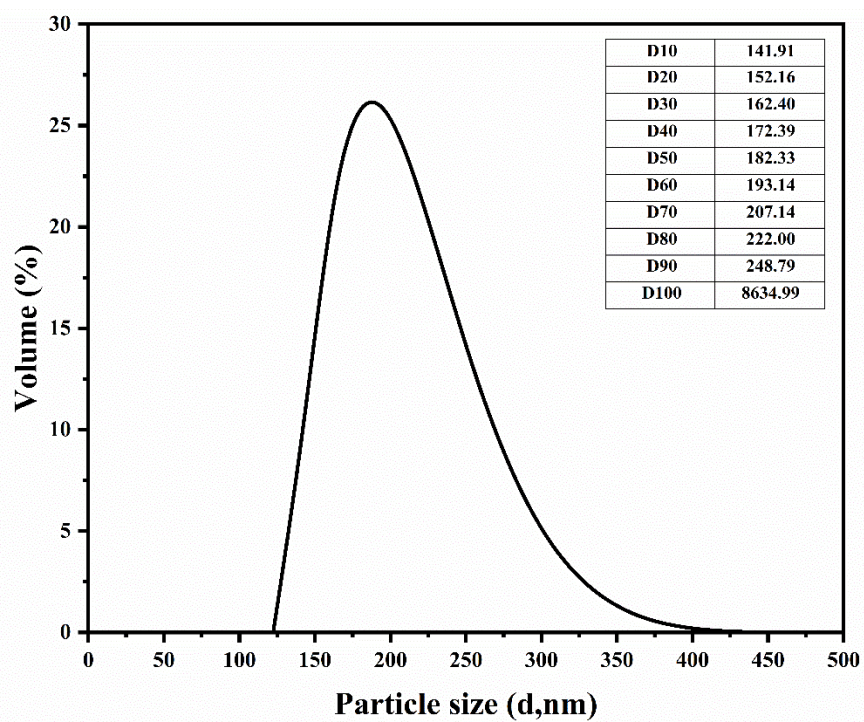

**Figure S1.** Particle size distribution of SCW.

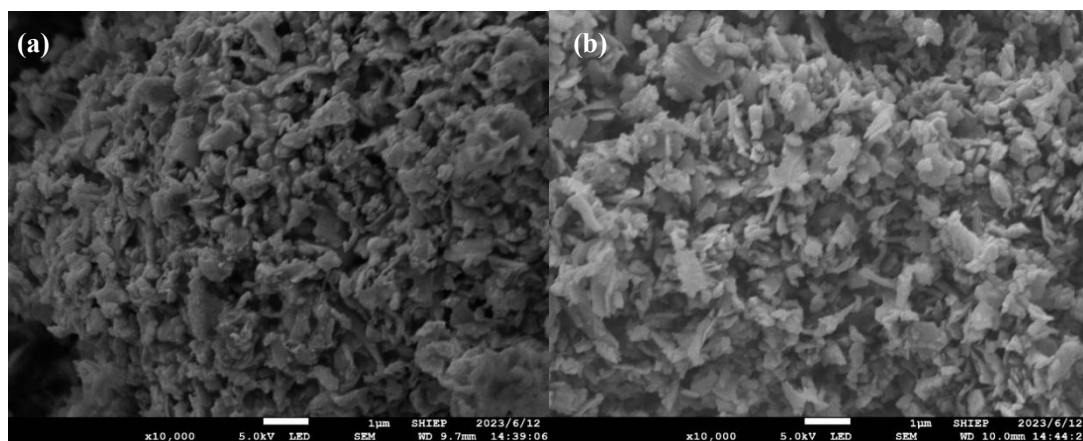

**Figure S2.** SEM images of (a) Si@SiO<sub>2</sub>@C-2 and (b) Si@SiO<sub>2</sub>@C-4.

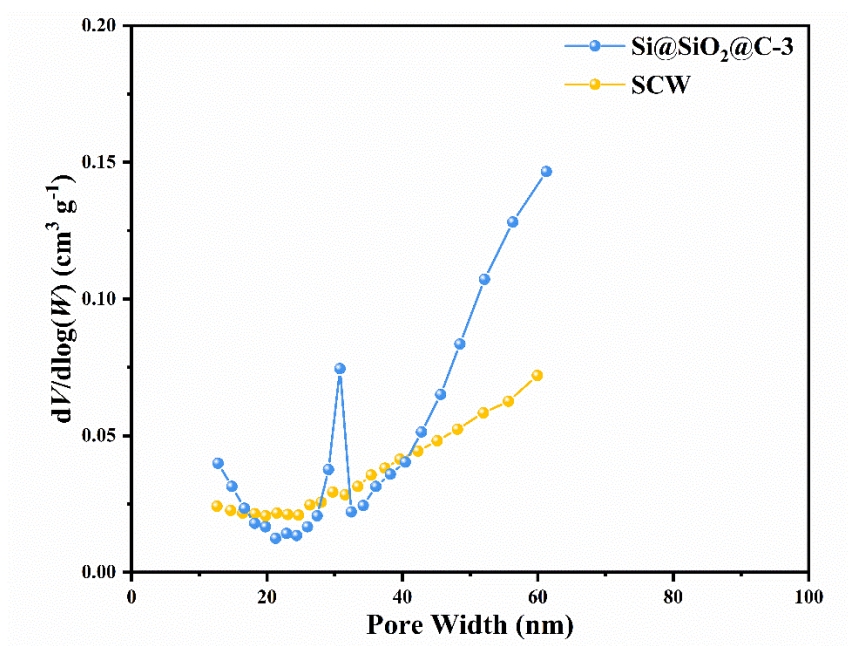

**Figure S3.** Pore size distribution of SCW and Si@SiO<sub>2</sub>@C-3.

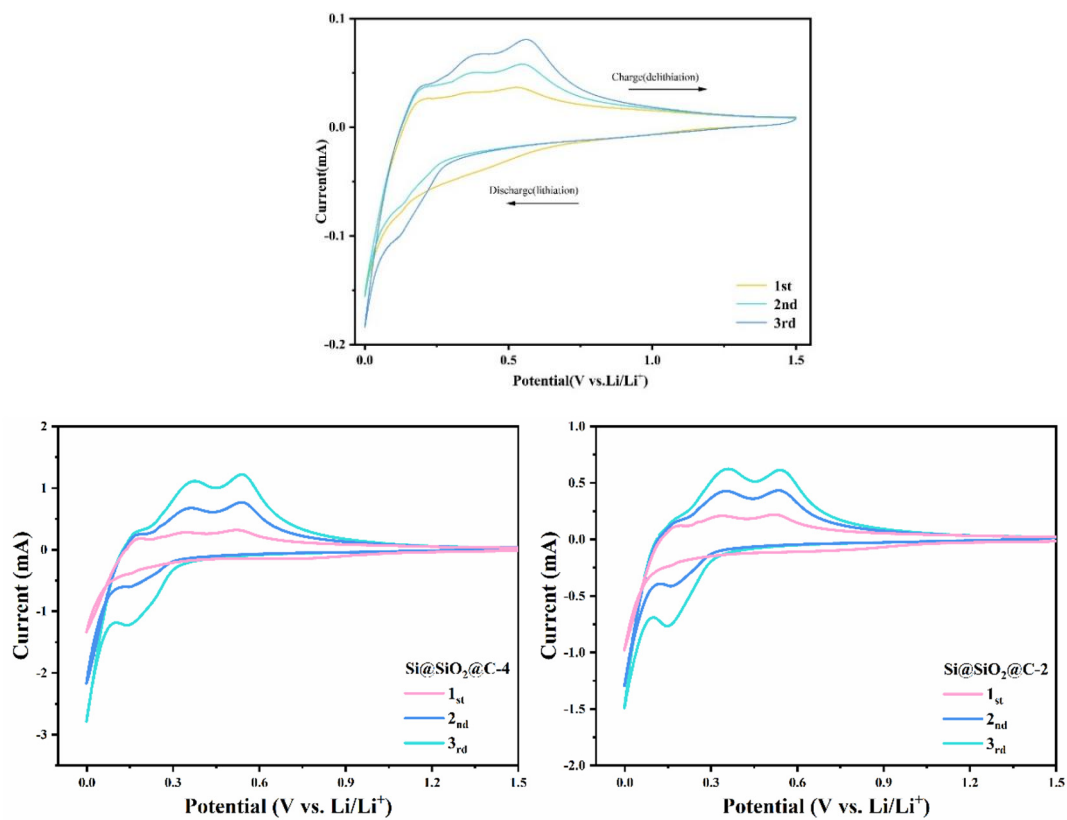

**Figure S4.** The initial three CV curves of SCW, Si@SiO<sub>2</sub>@C-4 and Si@SiO<sub>2</sub>@C-2 at 0.1 mV s<sup>-1</sup>.

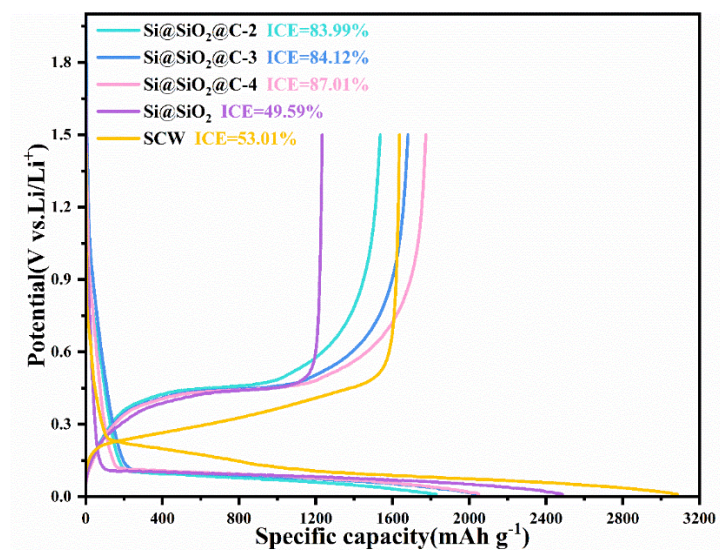

**Figure S5.** The initial GCD curves of SCW, Si@SiO<sub>2</sub>, Si@SiO<sub>2</sub>@C-4, Si@SiO<sub>2</sub>@C-3 and

Si@SiO<sub>2</sub>@C-2 at 0.1 mV s<sup>-1</sup>.

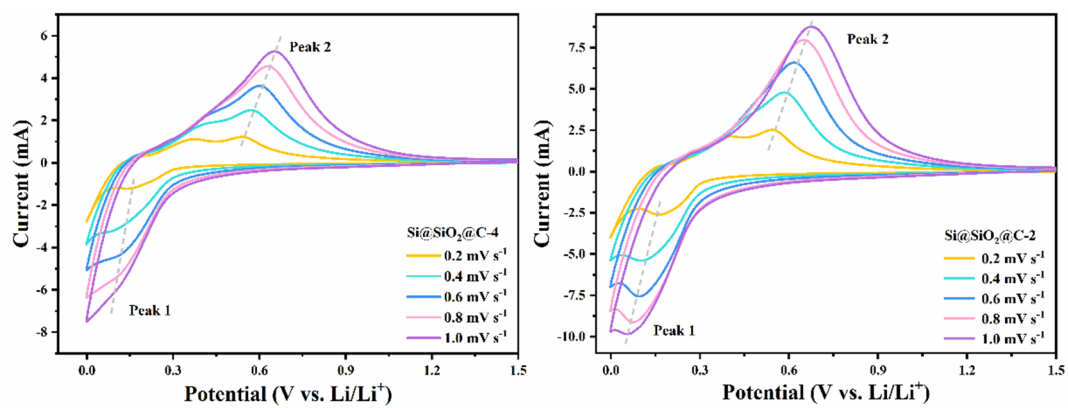

**Figure S6.** The CV curves of Si@SiO<sub>2</sub>/C at 0.2, 0.4, 0.6, 0.8 and 1.0 mV s<sup>-1</sup> scan rates.

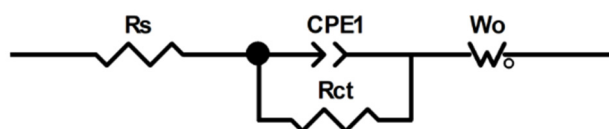

**Figure S7.** Equivalent circuit model linked with EIS curves.



**Table S1.** XRF results of SCW.

| Sample EA         | Si      | C      | O      | Ni     | Cl     | Fe     | Cu     | Ca     | Al     |
|-------------------|---------|--------|--------|--------|--------|--------|--------|--------|--------|
| <b>Weight (%)</b> | 82.4808 | 9.1417 | 8.1182 | 0.0679 | 0.0622 | 0.0513 | 0.0313 | 0.0273 | 0.0194 |

**Table S2.** BET specific surface area, pore volume, and BJH pore size of SCW and Si@SiO<sub>2</sub>@C-

3.

| Sample                   | S <sub>BET</sub> (m <sup>2</sup> g <sup>-1</sup> ) | V <sub>total</sub> (cm <sup>3</sup> g <sup>-1</sup> ) | Average pore size (BJH) (nm) |
|--------------------------|----------------------------------------------------|-------------------------------------------------------|------------------------------|
| SCW                      | 114.49                                             | 0.26                                                  | 8.31                         |
| Si@SiO <sub>2</sub> @C-3 | 60.56                                              | 0.13                                                  | 9.29                         |

**Table S3.** The  $R_{ct}$  and Warburg values of SCW, Si@SiO<sub>2</sub>@C-2, Si@SiO<sub>2</sub>@C-3 and Si@SiO<sub>2</sub>@C-

4.

| Sample                   | $R_{ct}$ (ohm) | $\sigma$ ( $\Omega$ S <sup>-1/2</sup> ) |
|--------------------------|----------------|-----------------------------------------|
| SCW                      | 37.17          | 236.16                                  |
| Si@SiO <sub>2</sub> @C-2 | 26.56          | 55.39                                   |
| Si@SiO <sub>2</sub> @C-3 | 18.55          | 32.11                                   |
| Si@SiO <sub>2</sub> @C-4 | 57.19          | 69.26                                   |
